# Supplementary material for: Impact of Mantle Cell Lymphoma Contamination of Autologous Stem Cell Grafts on Outcome after High-Dose Chemotherapy
Source: MDPI journal article supplement (doi:10.3390/cancers13112558), 2021-05-23

Supplementary Materials

# Impact of Mantle Cell Lymphoma Contamination of Autologous Stem Cell Grafts on Outcome After High-Dose Chemotherapy

Malte Roerden, Stefan Wirths, Martin Sökler, Wolfgang A. Bethge, Wichard Vogel and Juliane S. Walz

| Graft-MRD                                              | <u>Pre-transplant analysis</u> |       |        | <u>Post-transplant analysis</u> |         |
|--------------------------------------------------------|--------------------------------|-------|--------|---------------------------------|---------|
|                                                        | PB-FC                          | BM-FC | BM-PCR | PB-FC                           | BM-FC   |
| Negative ( <i>n</i> = 21)<br>% Positive (no. analyzed) | 0 (7)                          | 0 (1) | 0 (6)  | 0 (16)                          | 0 (6)   |
| Positive ( <i>n</i> = 3)<br>% Positive (no. analyzed)  | n.d.                           | n.d.  | n.d.   | 0 (3)                           | 100 (1) |

**Table S1.** Comparison of graft-MRD with clinical routine assessment of remission status. Comparison of graft-MRD analysis with data from clinical routine flow cytometry-based analysis of remission status in the respective last and/or first analysis before and after autologous hematopoietic stem cell transplantation. Data shown for patients for whom data from at least one timepoint were available (*n* = 24). Abbreviations: BM, bone marrow; FC, flow cytometry; MRD, measurable residual disease; no., number; n.d., not done and PCR, polymerase chain reaction.

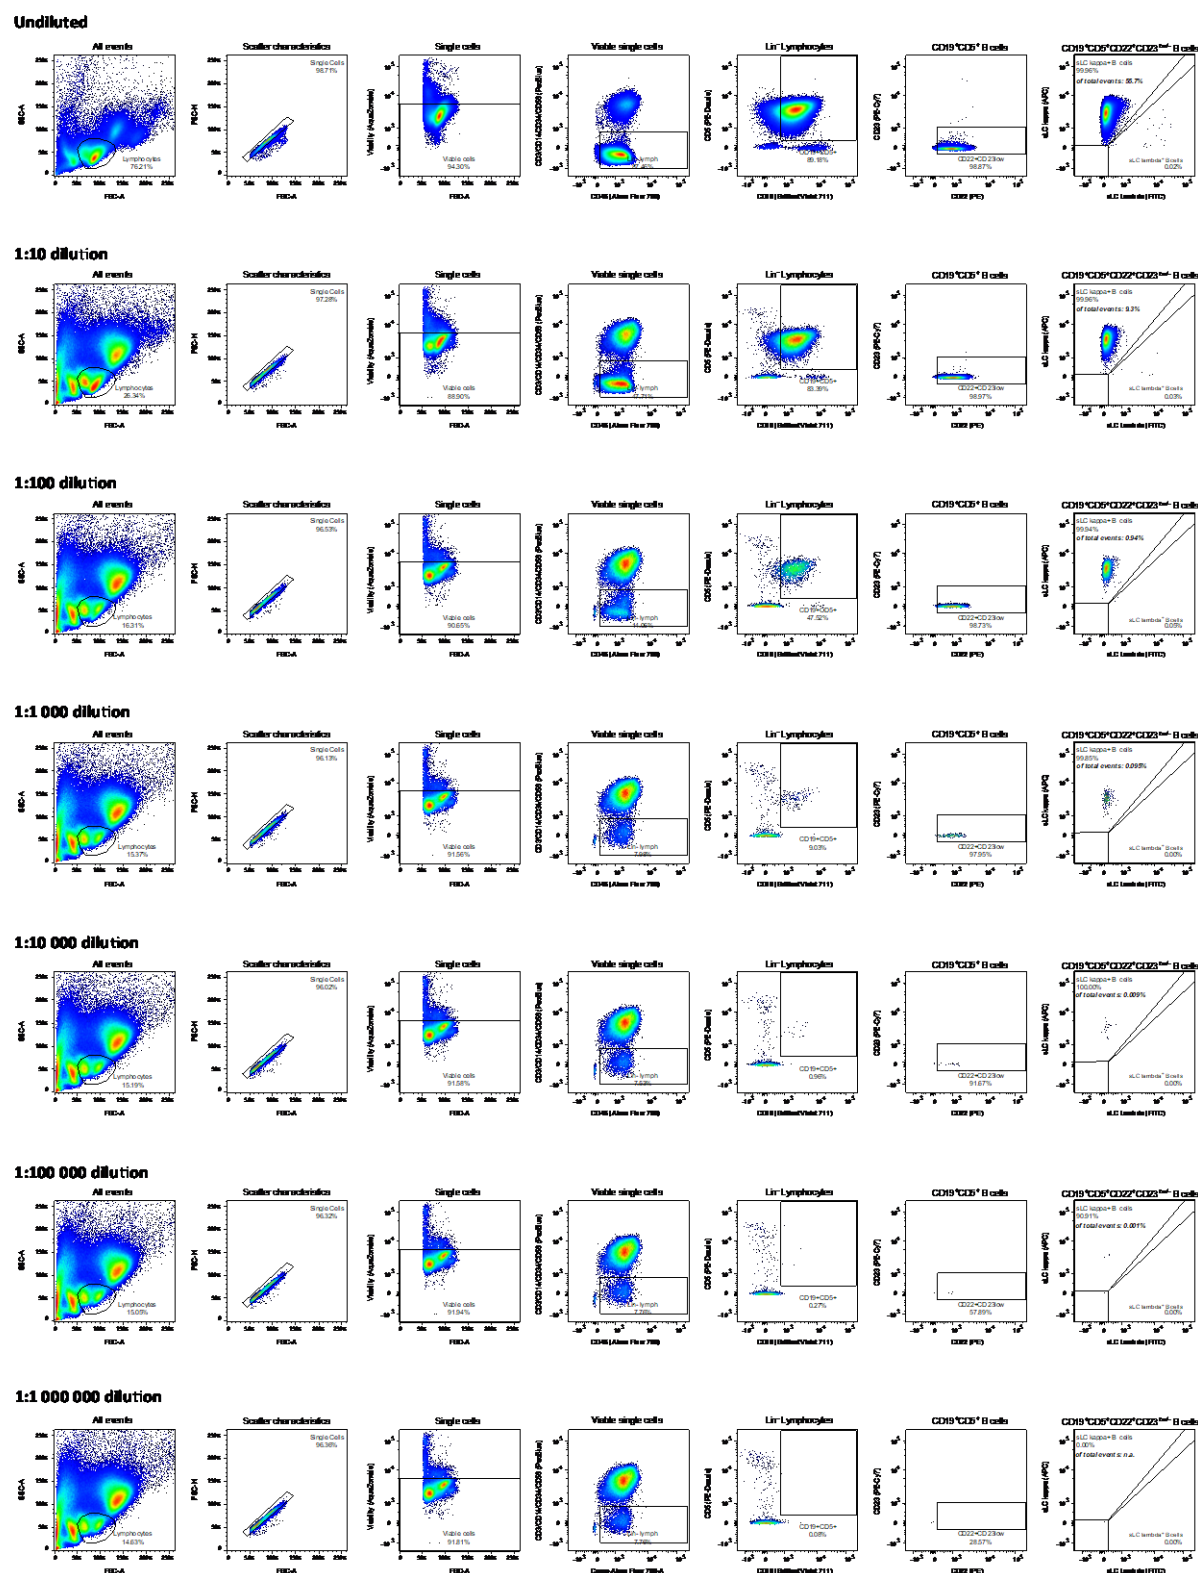

**Figure S1:** Serial dilution of control MCL sample. Assessment of multiparameter flow cytometry panel sensitivity for detection of measurable residual disease by Serial dilution of a control mantle cell lymphoma sample in an autologous stem cell graft without measurable residual disease.

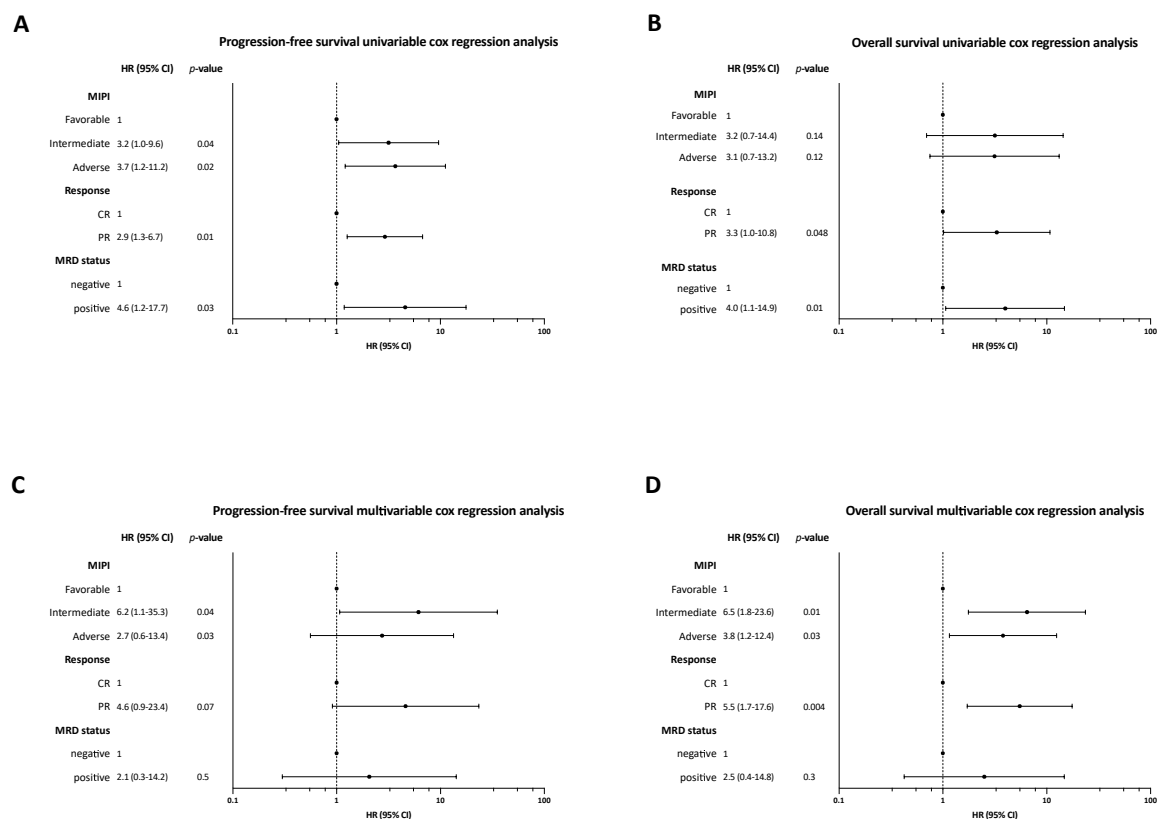

**Figure S2:** Univariable and multivariable cox regression analysis. Cox regression analysis of determinants for survival after autologous hematopoietic stem cell transplantation.

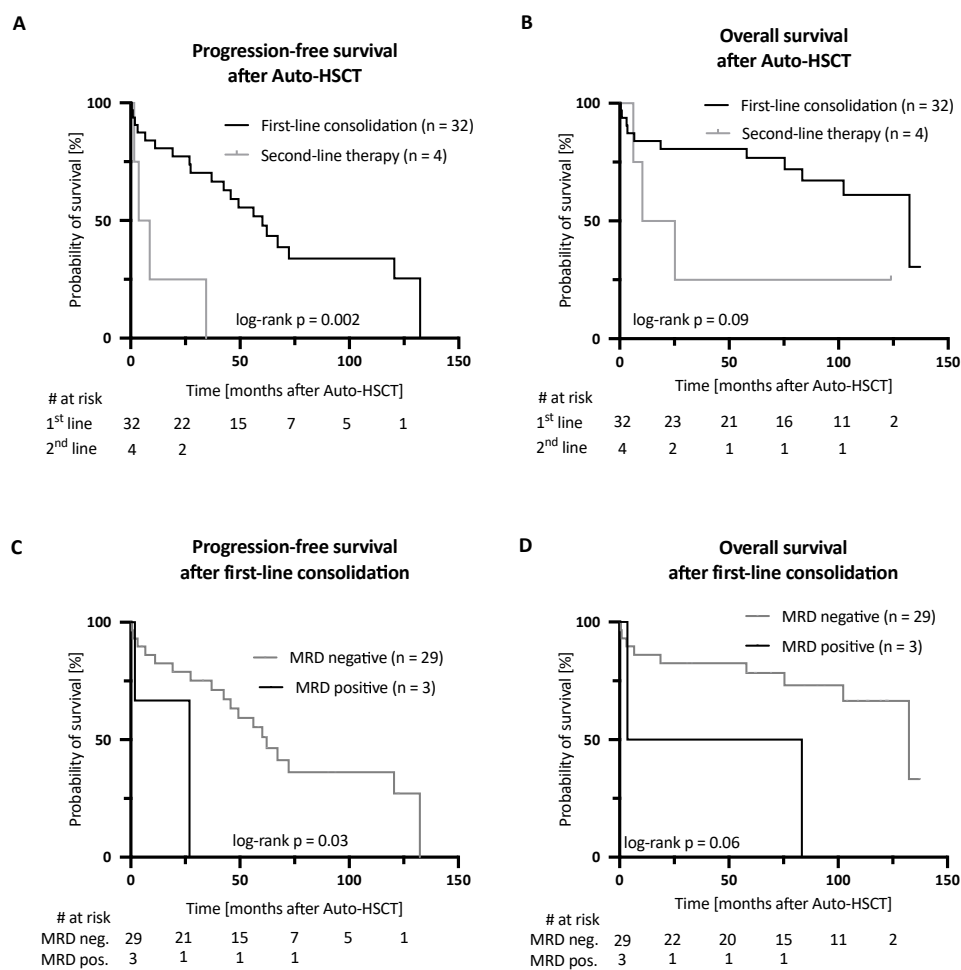

**Figure S3:** Treatment setting and outcome after autologous HSCT. (A–B) Kaplan-Meier estimates of (A) progression-free (PFS) and (B) overall survival (OS) grouped by treatment setting (first-line consolidation versus second-line therapy). (C–D) Kaplan-Meier estimates of (C) PFS and (D) OS in the subgroup of patients undergoing autologous HSCT as first-line consolidating therapy ( $n = 32$ ).

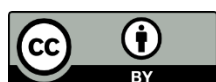

Supplement: s1 [file s1]
